# Supplementary material
Source: publisher site journal article supplement (https://static.cambridge.org/content/id/urn:cambridge.org:id:article:S1935789315000749/resource/name/S1935789315000749supp001.docx)
Supplement: Supplementary file 1 [file S1935789315000749supp001.docx]

Dr. Eduardo Dolhun, Adjunct Assistant Clinical Professor at the Stanford University Medical Center and member of the Society of Disaster Medicine and Public Health, has offered aid during 4 of the worst global disasters: Haiti (earthquake), Pakistan (floods), Philippines (Typhoon), and Nepal. You can view the full-length version of Dr. Dolhun’s video of Nepal on the Society’s website, <http://sdmph.org/publications/dmphp-journal/supplementary-file-for-doi-10-1017s1935789315000749/>. To read more about Dr. Dolhun, please see the Society’s Members Highlight page: <http://sdmph.org/sdmph-membership/members-highlight/>.
